# Supplementary material for: Highly efficient silica coated perovskite nanocrystals with the assistance of ionic liquids for warm white LEDs
Source: Royal Society of Chemistry journal article supplement (doi:10.1039/d2nr05118d), 2022-11-18
Supplement: d2nr05118d1.pdf [file d2nr05118d1.pdf]

## Electronic Supplementary Information

### Highly efficient silica coated perovskite nanocrystals with the assistance of ionic liquid for warm white LEDs

Yanqiao Xu,<sup>\*‡a,b</sup> Xiaobo Hu,<sup>‡c</sup> Huidong Tang,<sup>b</sup> Qing Hu,<sup>b</sup> Sanhai Wang,<sup>b</sup> Ting Chen,<sup>a</sup> Xiaojun Zhang,<sup>a,b</sup>

Weihui Jiang,<sup>a,b</sup> Lianjun Wang,<sup>\*c</sup> and Wan Jiang<sup>c</sup>

<sup>a</sup>National Engineering Research Center for Domestic & Building Ceramics, Jingdezhen Ceramic Institute, Jingdezhen 333000, China

<sup>b</sup>School of Material Science and Engineering, Jingdezhen Ceramic Institute, Jingdezhen 333000, China

<sup>c</sup>State Key Laboratory for Modification of Chemical Fibers and Polymer Materials College of Materials Science and Engineering, Donghua University, Shanghai 201620, China

<sup>\*</sup>Corresponding Authors. Emails: xuyanqiao@jcu.edu.cn (Y. X.); wanglj@dhu.edu.cn (L. W.)

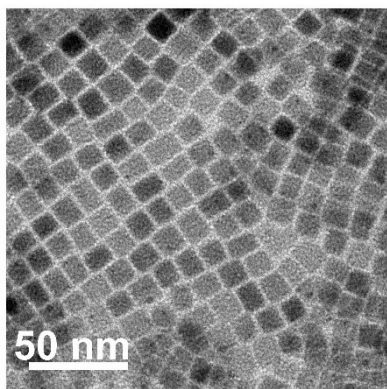

**Fig. S1** TEM image of CsPbBr<sub>3</sub> NCs.

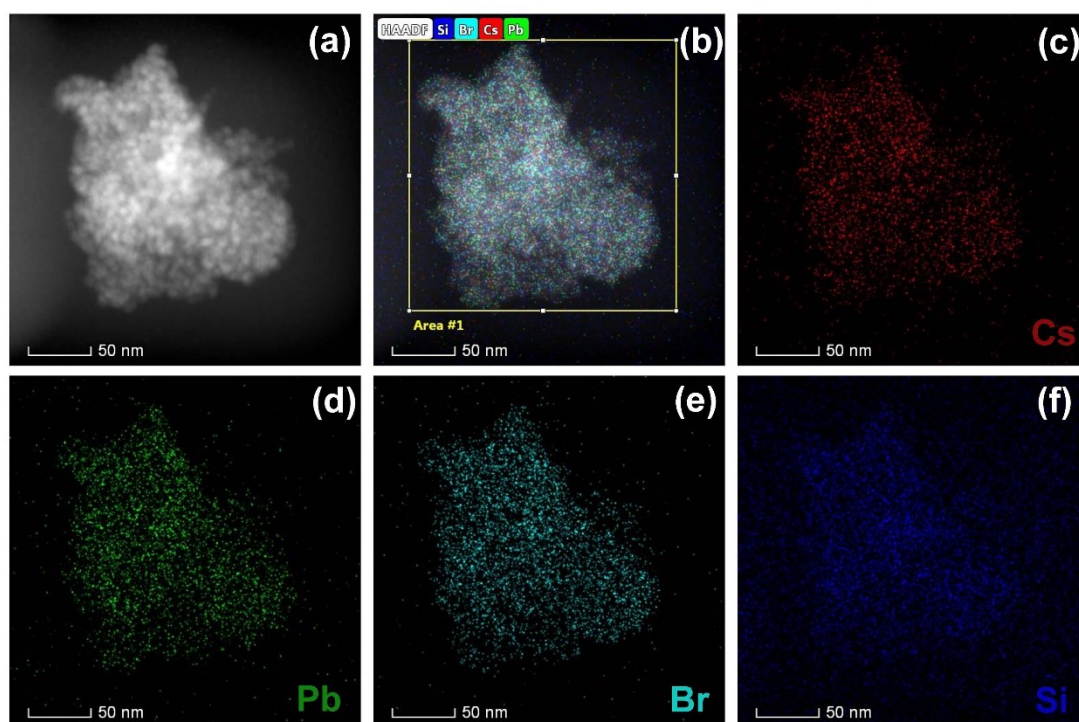

**Fig. S2** (a) HAADF-STEM image and (b-f) elemental maps of CsPbBr<sub>3</sub>@SiO<sub>2</sub> NCs.

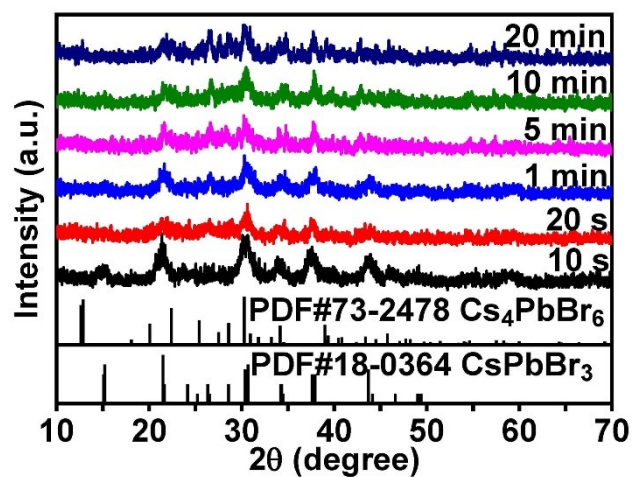

**Fig. S3** XRD patterns of CsPbBr<sub>3</sub>@SiO<sub>2</sub> NCs prepared with different hydrolysis time of APTES.

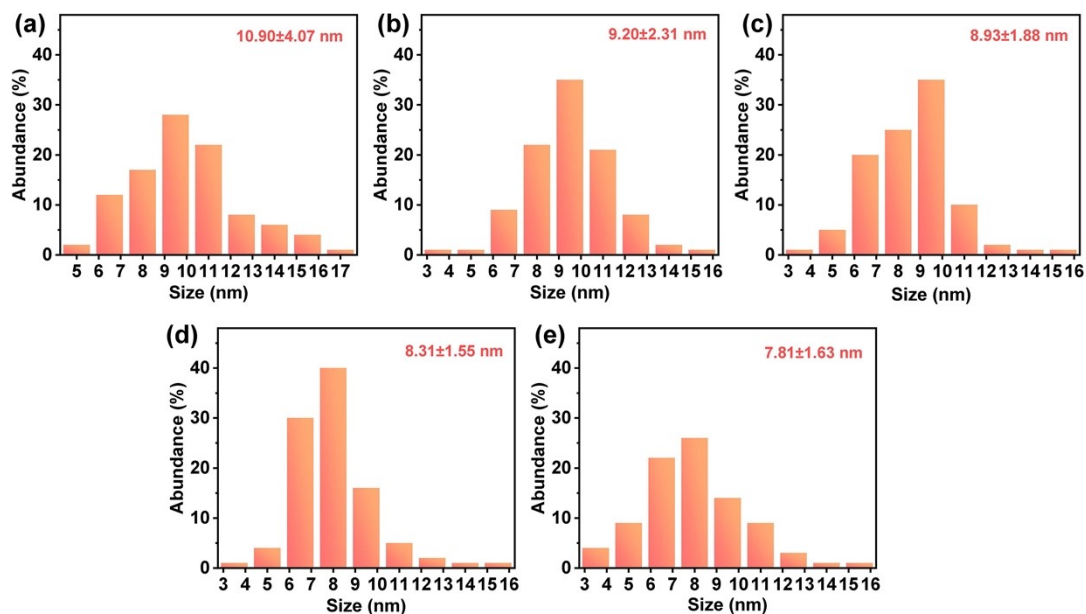

**Fig. S4** Size distribution histograms of CsPbBr<sub>3</sub> cores prepared with hydrolysis time of (a) 10 s, (b) 20 s, (c) 1 min, (d) 5 min, and (e) 10 min.

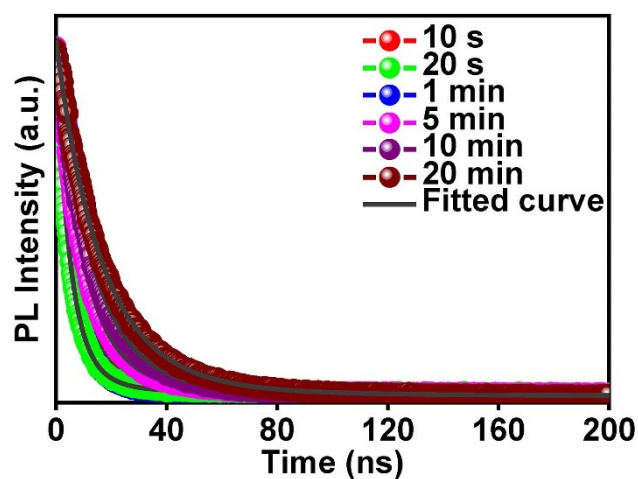

**Fig. S5** Decay curves of CsPbBr<sub>3</sub>@SiO<sub>2</sub> NCs prepared with different hydrolysis time of APTES.

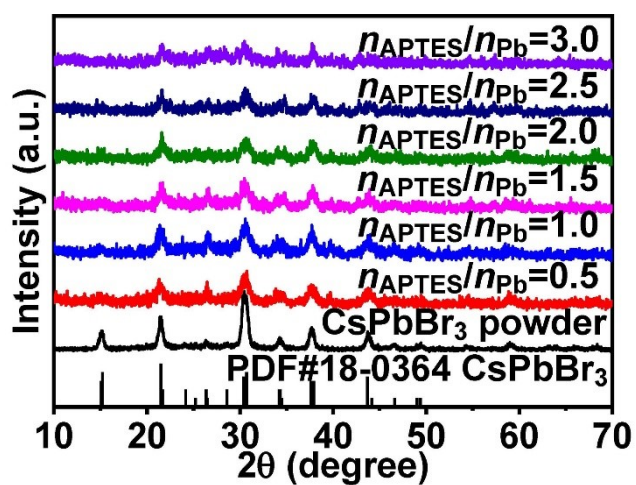

**Fig. S6** XRD patterns of CsPbBr<sub>3</sub>@SiO<sub>2</sub> NCs prepared by one-step method with different  $n_{\text{APTES}}/n_{\text{Pb}}$  ratios (Adding APTES into anti-solvent).

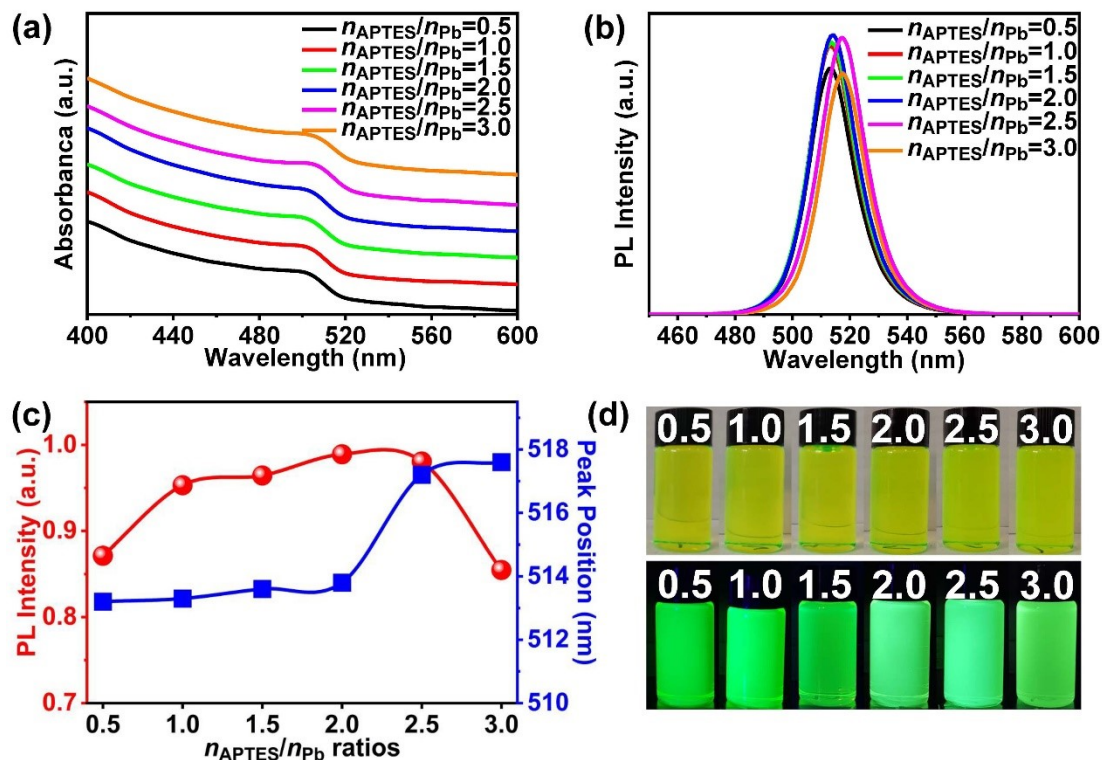

**Fig. S7** (a) Absorption, (b) emission spectra, (c) evolution of emission intensity and peak position of  $\text{CsPbBr}_3@ \text{SiO}_2$  NCs prepared by one-step method with different  $n_{\text{APTES}}/n_{\text{Pb}}$  ratios, and (d) photos of samples under sunlight and UV light (Adding APTES into anti-solvent).

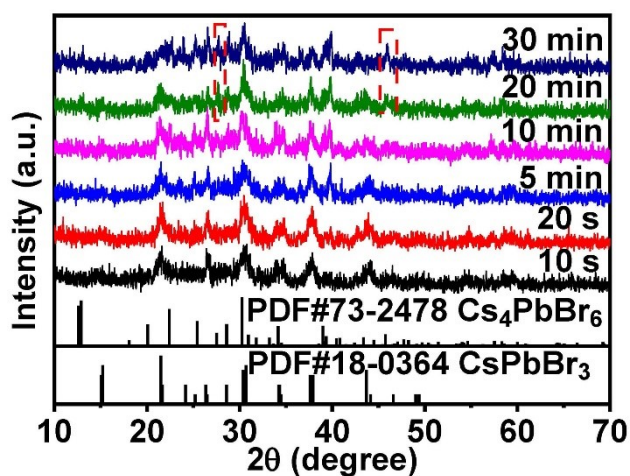

**Fig. S8** XRD patterns of  $\text{CsPbBr}_3@ \text{SiO}_2$  NCs prepared by one-step method with different reaction time (Adding APTES into anti-solvent).

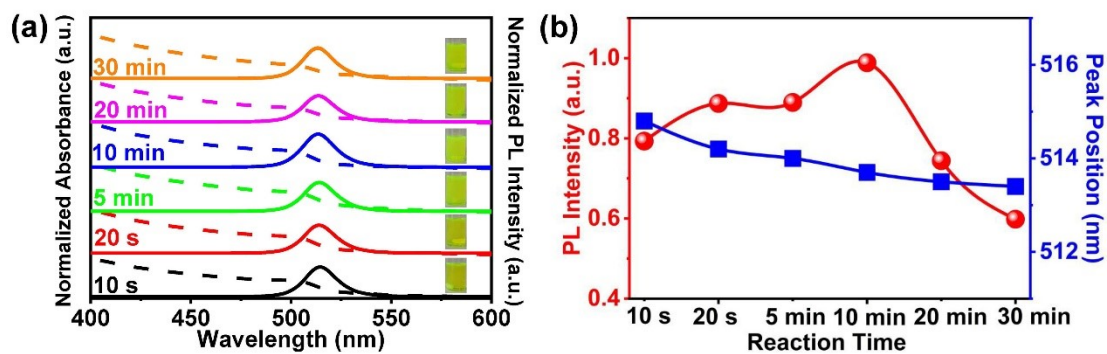

**Fig. S9** (a) Absorption and emission spectra, and (b) evolution of emission intensity and peak position of CsPbBr<sub>3</sub>@SiO<sub>2</sub> NCs prepared by one-step method with different reaction time (Adding APTES into anti-solvent).

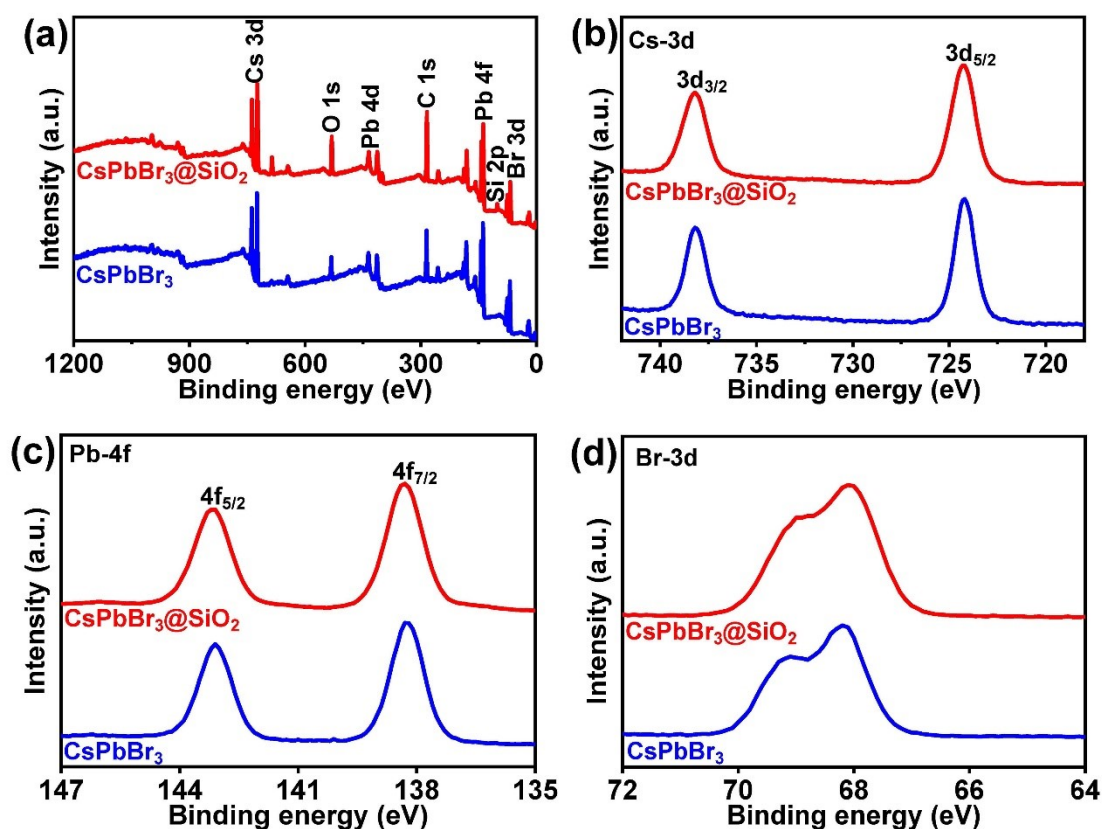

**Fig. S10** (a) XPS survey spectra, and XPS element analysis of (b) Cs-3d, (c) Pb-4f, (d) Br-3d, (e) N-1s, and (f) Si-2p of CsPbBr<sub>3</sub> NCs and CsPbBr<sub>3</sub>@SiO<sub>2</sub> NCs.

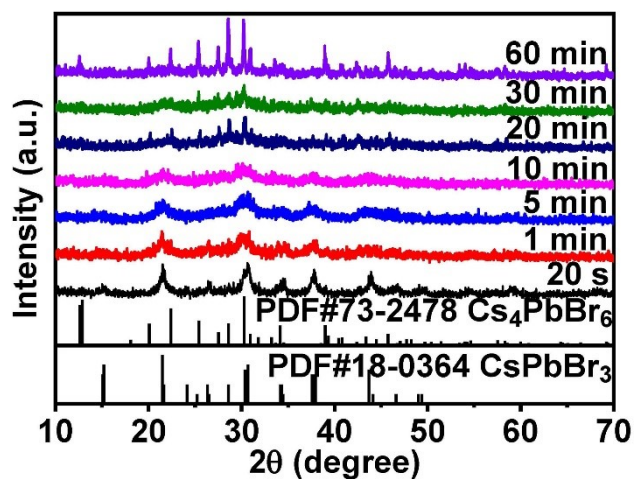

**Fig. S11** XRD patterns of CsPbBr<sub>3</sub>@SiO<sub>2</sub> NCs prepared with different reaction time (Without adding IL).

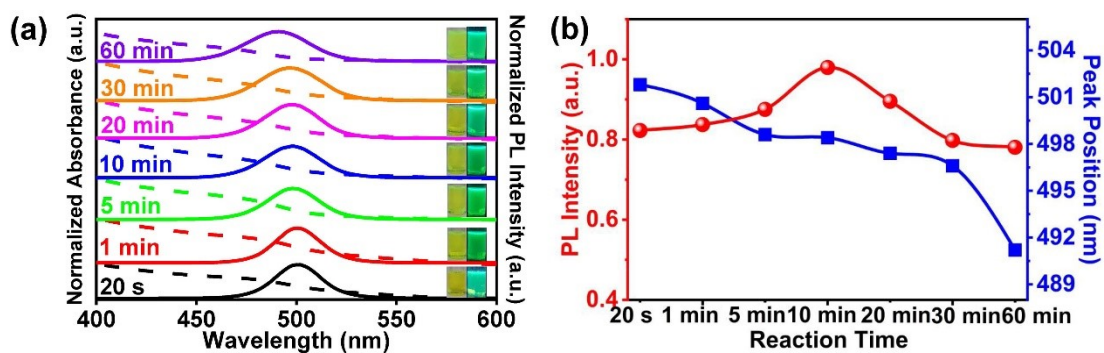

**Fig. S12** (a) Absorption and emission spectra, and (b) evolution of emission intensity and peak position of CsPbBr<sub>3</sub>@SiO<sub>2</sub> NCs prepared with different reaction time (Without adding IL).

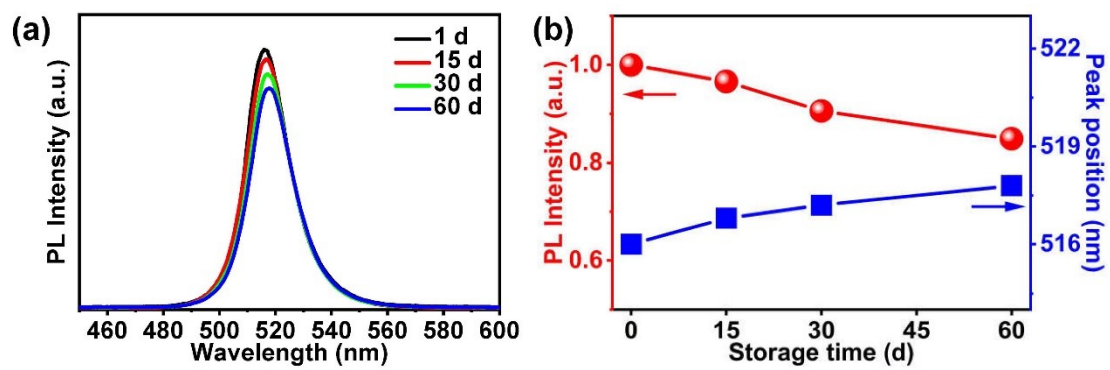

Fig. S13 Storage stability test results of CsPbBr<sub>3</sub> NCs.

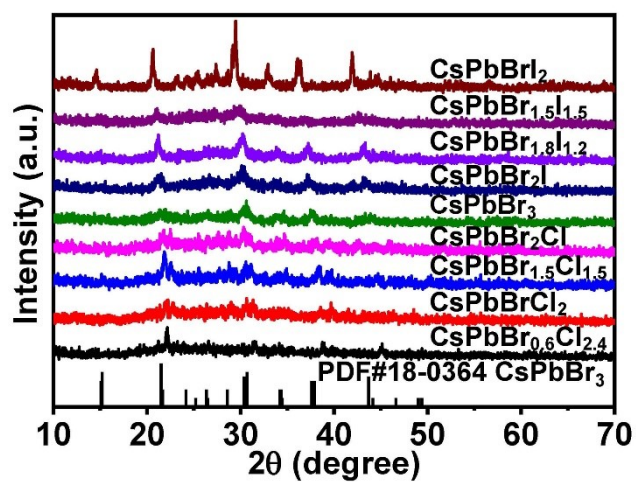

Fig. S14 XRD patterns of CsPbX<sub>3</sub>@SiO<sub>2</sub> NCs.

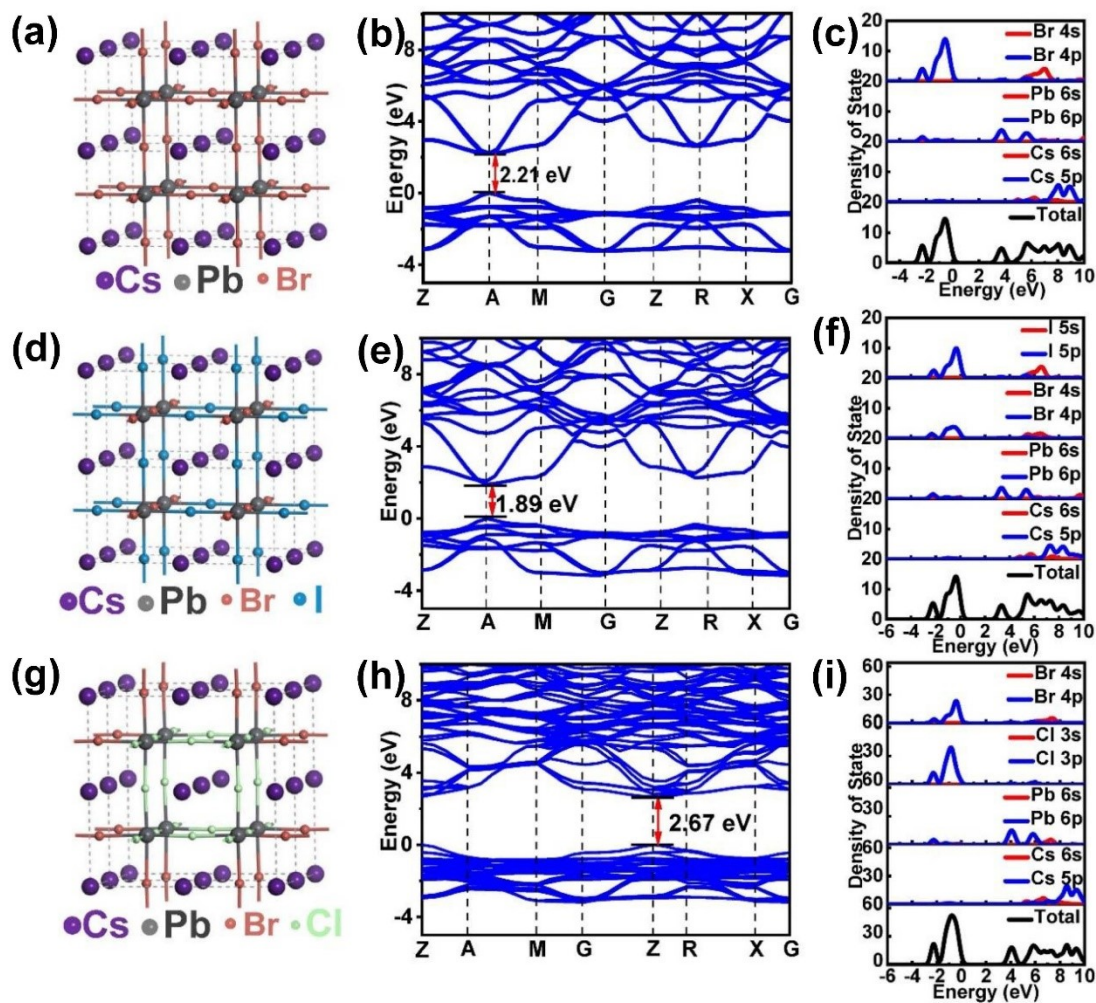

**Fig. S15** Optimized structures, calculated electronic band structures and density of state of (a-c) CsPbBr<sub>3</sub>, (d-f) CsPbBrI<sub>2</sub>, and (g-i) CsPbBrCl<sub>2</sub>.

The theoretical calculations were carried out using Cambridge Serial Total Energy Package (CASTEP) based on plane-wave pseudo-potential.<sup>1</sup> Generalized gradient approximation of Perdew-Burke-Ernzerhof (PBE) was adopted for the exchange-correlation functional.<sup>2</sup> The Monkhorst 2×2×2 grid was used for CsPbX<sub>3</sub> and the  $E_{\text{cut}}$  was set as 300 eV. Structure relaxation was stopped until the force of each atom was less than 0.01 eV/Å. The optimized structures, calculated electronic band structures, and density of state of CsPbBr<sub>3</sub>, CsPbBrI<sub>2</sub>, and CsPbBrCl<sub>2</sub> were shown in Fig. S15. It was found that the conduction band of CsPbBr<sub>3</sub> was composed

of 6p orbital of Pb atoms, while the valance band was formed by the antibonding interaction between Br 4p and Pb 6s states due to the strong hybridization (Fig. S15c). Moreover, the 3p orbital of Cl atoms or 5p orbital of I atoms involved in the formation of valance band when partial Br was replaced with Cl or I (Fig. S15(f) and (i)). The calculated bandgap of CsPbBr<sub>3</sub>, CsPbBrI<sub>2</sub>, and CsPbBrCl<sub>2</sub> was 2.21 eV, 1.89 eV, and 2.67 eV, respectively.

**Table S1** The performances of silica coated perovskite NCs

| Samples                                                             | Silicon source     | Reaction time | PLQY  | Ref                       |
|---------------------------------------------------------------------|--------------------|---------------|-------|---------------------------|
| CH <sub>3</sub> NH <sub>3</sub> PbBr <sub>3</sub> @SiO <sub>2</sub> | TMOS <sup>a</sup>  | 36 h          | 87%   | Huang et al. <sup>3</sup> |
| CsPbBr <sub>3</sub> @SiO <sub>2</sub>                               | TMOS               | 12 h          | 65%   | Li et al. <sup>4</sup>    |
| CsPbBr <sub>3</sub> @SiO <sub>2</sub>                               | APTES <sup>b</sup> | 3 h           | 78%   | Sun et al. <sup>5</sup>   |
| CsPbBr <sub>3</sub> @SiO <sub>2</sub>                               | TMOS               | 24 h          | 73.4% | Zhang et al. <sup>6</sup> |
| CsPbBr <sub>3</sub> @SiO <sub>x</sub>                               | TEOS               | 10 h          | –     | Park et al. <sup>7</sup>  |
| CsPbBr <sub>3</sub> @SiO <sub>2</sub>                               | TMOS               | 12 h          | 80%   | Hu et al. <sup>8</sup>    |
| CsPbBr <sub>3</sub> @SiO <sub>2</sub>                               | APTES <sup>c</sup> | 20 s          | 85.7% | This work                 |

<sup>a</sup> tetramethyl orthosilicate; <sup>b</sup> (3-aminopropyl)triethoxysilane; <sup>c</sup> tetraethyl orthosilicate.

**Table S2** Fitting results of PL decay curves of CsPbBr<sub>3</sub>@SiO<sub>2</sub> NCs prepared with different  $n_{\text{APTES}}/n_{\text{Pb}}$  ratios

| $n_{\text{APTES}}/n_{\text{Pb}}$ | $\tau_1/\text{ns}$ | $B_1/\%$ | $\tau_2/\text{ns}$ | $B_2/\%$ | $\chi^2$ | $\tau_{\text{av}}/\text{ns}$ |
|----------------------------------|--------------------|----------|--------------------|----------|----------|------------------------------|
| 0                                | 10.13              | 91.28    | 60.20              | 8.72     | 0.9955   | 28.26                        |
| 1.0                              | 5.28               | 93.77    | 50.72              | 6.23     | 0.9990   | 22.98                        |
| 1.5                              | 6.14               | 96.91    | 26.04              | 3.09     | 0.9995   | 8.51                         |
| 2.0                              | 6.14               | 98.51    | 34.77              | 1.49     | 0.9996   | 8.40                         |
| 2.5                              | 16.88              | 95.01    | 62.31              | 4.99     | 0.9994   | 24.26                        |
| 3.0                              | 14.02              | 93.33    | 47.84              | 6.67     | 0.9994   | 20.65                        |

**Table S3** Fitting parameters of PL decay curves of CsPbBr<sub>3</sub>@SiO<sub>2</sub> NCs prepared with different hydrolysis time of APTES

| Time   | $\tau_1/\text{ns}$ | $B_1/\%$ | $\tau_2/\text{ns}$ | $B_2/\%$ | $\chi^2$ | $\tau_{\text{av}}/\text{ns}$ |
|--------|--------------------|----------|--------------------|----------|----------|------------------------------|
| 10 s   | 6.53               | 97.95    | 24.40              | 2.05     | 0.9996   | 7.83                         |
| 20 s   | 5.95               | 99.05    | 34.21              | 0.95     | 0.9995   | 7.43                         |
| 1 min  | 6.14               | 98.51    | 34.77              | 1.49     | 0.9996   | 8.40                         |
| 5 min  | 10.19              | 97.11    | 74.75              | 2.89     | 0.9994   | 21.76                        |
| 10 min | 13.13              | 96.61    | 65.37              | 3.39     | 0.9993   | 20.90                        |
| 20 min | 17.91              | 94.64    | 64.12              | 5.36     | 0.9995   | 25.70                        |

**Table S4** Calculation results of VBM and CBM values of CsPbX<sub>3</sub> NCs and SiO<sub>2</sub>

| Samples                                 | VBM/eV | Optical bandgap/eV | CBM/eV |
|-----------------------------------------|--------|--------------------|--------|
| CsPbBr <sub>0.6</sub> Cl <sub>2.4</sub> | -6.322 | 3.046              | -3.276 |
| CsPbBrCl <sub>2</sub>                   | -6.284 | 2.894              | -3.390 |
| CsPbBr <sub>2</sub> Cl                  | -6.170 | 2.696              | -3.474 |
| CsPbBr <sub>3</sub>                     | -5.916 | 2.360              | -3.556 |
| CsPbBr <sub>2</sub> I                   | -5.881 | 2.258              | -3.623 |
| CsPbBrI <sub>2</sub>                    | -5.558 | 1.912              | -3.646 |
| SiO <sub>2</sub>                        | -8.435 | 8.600              | 0.165  |

## References

- 1 M. D. Segall, P. J. D. Lindan, M. J. Probert, C. J. Pickard, P. J. Hasnip, S. J. Clark and M. C. Payne, First-principles simulation: ideas, illustrations and the CASTEP code, *J. Phys.: Condens. Matter*, 2002, **14**, 2717–2744.
- 2 J. P. Perdew, K. Burke and M. Ernzerhof, Generalized gradient approximation made simple, *Phys. Rev. Lett.*, 1996, **77**, 3865–3868.
- 3 S. Huang, Z. Li, L. Kong, N. Zhu, A. Shan and L. Li, Enhancing the stability of CH<sub>3</sub>NH<sub>3</sub>PbBr<sub>3</sub> quantum dots by embedding in silica spheres derived from tetramethyl orthosilicate in “waterless” toluene, *J. Am. Chem. Soc.*, 2016, **138**, 5749–5752.
- 4 M. Li, X. Zhang and P. Yang, Controlling the growth of a SiO<sub>2</sub> coating on hydrophobic CsPbBr<sub>3</sub> nanocrystals towards aqueous transfer and high luminescence, *Nanoscale*, 2021, **13**, 3860–3867.
- 5 C. Sun, Y. Zhang, C. Ruan, C. Yin, X. Wang, Y. Wang and W. W. Yu, Efficient and stable white LEDs with silica-coated inorganic perovskite quantum dots, *Adv.*

*Mater.*, 2016, **28**, 10088–10094.

- 6 L. Zhang, Y. Xie, Z. Tian, Y. Liu, C. Geng and S. Xu, Thermal conductive encapsulation enables stable high-power perovskite-converted light-emitting diodes, *ACS Appl. Mater. Interfaces*, 2021, **13**, 30076–30085.
- 7 S. Park, M. N. An, G. Almeida, F. Palazon, D. Spirito, R. Krahne, Z. Dang, L. D. Trizio and L. Manna, CsPbX<sub>3</sub>/SiO<sub>x</sub> (X= Cl, Br, I) monoliths prepared via a novel sol-gel route starting from Cs<sub>4</sub>PbX<sub>6</sub> nanocrystals, *Nanoscale*, 2019, **11**, 18739–18745.
- 8 H. Hu, L. Wu, Y. Tan, Q. Zhong, M. Chen, Y. Qiu, D. Yang, B. Sun, Q. Zhang and Y. Yin, Interfacial synthesis of highly stable CsPbX<sub>3</sub>/oxide Janus nanoparticles, *J. Am. Chem. Soc.*, 2018, **140**, 406–412.
